# Supplementary material
Source: PubMed Central journal article supplement (PMC3568992)
Supplement: NIHMS354438-supplement-01.pdf [file NIHMS354438-supplement-01.pdf]

**Supplementary Table 1. Oligonucleotides used to introduce mutations in the AAP coding**

**sequence.** Plus and minus strands were annealed together and cloned into *AgeI/SpeI*, *AgeI/MluI*, or *SpeI/MluI* sites as shown in Supplementary Fig. 1.

| Oligo Name | Sequence (5' - 3')                                                                              |
|------------|-------------------------------------------------------------------------------------------------|
| R4* +      | CCGGT <b>TAG</b> CCGTCAGTCTTCA                                                                  |
| R4* -      | CTAGTGAAGACTGACGG <b>GCTAA</b>                                                                  |
| P5* +      | CCGGTCGCT <b>AGT</b> CAGTCTTCA                                                                  |
| P5* -      | CTAGTGAAGACTGACT <b>AGCGA</b>                                                                   |
| S6* +      | CCGGTCGCCCG <b>TAG</b> GTCTTCA                                                                  |
| S6* -      | CTAGTGAAGAC <b>CTAC</b> GGGCGA                                                                  |
| V7* +      | CCGGTCGCCCG <b>TCATAG</b> TTCA                                                                  |
| V7* -      | CTAGTGA <b>ACTATG</b> ACGGGCGA                                                                  |
| F8* +      | CCGGTCGCCCG <b>TCAGTCTAGA</b>                                                                   |
| F8* -      | CTAGT <b>CTAG</b> ACTGACGGGCGA                                                                  |
| T9* +      | CCGGTCGCCCG <b>TCAGTCTTCTAG</b> AGTCAGGATTACCTCTCAGACCATCTGTG<br>GAGAGCCCTTAACGCGTAAA           |
| T9* -      | AGCTTTTACGCGT <b>TAA</b> GGGCTCTCCACAGATGGTCTGAGAGGTAATCCTGAC<br>T <b>CTAGA</b> AAGACTGACGGGCGA |
| S10* +     | CCGGTCGCCCG <b>TCAGTCTTCACTTAG</b> CAGGATTACCTCTCAGACCATCTGTG<br>GAGAGCCCTTAACGCGTAAA           |
| S10* -     | AGCTTTTACGCGT <b>TAA</b> GGGCTCTCCACAGATGGTCTGAGAGGTAATCCT <b>GCT</b><br>AAGTGAAGACTGACGGGCGA   |
| Q11* +     | CTAGT <b>TAG</b> GATTACCTCTCAGACCATCTGTGGAGAGCCCTTAACGCGTAAA                                    |
| Q11* -     | AGCTTTTACGCGT <b>TAA</b> GGGCTCTCCACAGATGGTCTGAGAGGTAATC <b>CCTAA</b>                           |
| D12* +     | CTAGTCAG <b>TAGT</b> ACCTCTCAGACCATCTGTGGAGAGCCCTTAACGCGTAAA                                    |
| D12* -     | AGCTTTTACGCGT <b>TAA</b> GGGCTCTCCACAGATGGTCTGAGAGG <b>TACTACTGA</b>                            |
| Y13* +     | CTAGTCAGGAT <b>TAG</b> CTCTCAGACCATCTGTGGAGAGCCCTTAACGCGTAAA                                    |
| Y13* -     | AGCTTTTACGCGT <b>TAA</b> GGGCTCTCCACAGATGGTCTGAGAG <b>CTAATCCTGA</b>                            |
| L14* +     | CTAGTCAGGAT <b>TACTAGT</b> CAGACCATCTGTGGAGAGCCCTTAACGCGTAAA                                    |
| L14* -     | AGCTTTTACGCGT <b>TAA</b> GGGCTCTCCACAGATGGTCTG <b>ACTAGT</b> AATCCTGA                           |
| S15* +     | CTAGTCAGGAT <b>TACCTTAG</b> GACCATCTGTGGAGAGCCCTTAACGCGTAAA                                     |
| S15* -     | AGCTTTTACGCGT <b>TAA</b> GGGCTCTCCACAGATGGT <b>CCTAG</b> AGGTAATCCTGA                           |
| D16* +     | CTAGTCAGGAT <b>TACCTCTCATAG</b> CATCTGTGGAGAGCCCTTAACGCGTAAA                                    |
| D16* -     | AGCTTTTACGCGT <b>TAA</b> GGGCTCTCCACAGATG <b>CTATG</b> AGAGGTAATCCTGA                           |
| H17* +     | CTAGTCAGGAT <b>TACCTCTCAGACTAG</b> CTGTGGAGAGCCCTTAACGCGTAAA                                    |
| H17* -     | AGCTTTTACGCGT <b>TAA</b> GGGCTCTCCACAG <b>CTAGT</b> CTGAGAGGTAATCCTGA                           |
| L18* +     | CTAGTCAGGAT <b>TACCTCTCAGACCATTAGT</b> GGAGAGCCCTTAACGCGTAAA                                    |
| L18* -     | AGCTTTTACGCGT <b>TAA</b> GGGCTCTCC <b>ACTAAT</b> GGTCTGAGAGGTAATCCTGA                           |
| W19* +     | CTAGTCAGGAT <b>TACCTCTCAGACCATCTGTAG</b> AGAGCCCTTAACGCGTAAA                                    |
| W19* -     | AGCTTTTACGCGT <b>TAA</b> GGGCTCT <b>CTAC</b> AGATGGTCTGAGAGGTAATCCTGA                           |
| R20* +     | CTAGTCAGGAT <b>TACCTCTCAGACCATCTGTGGTAG</b> GCCCTTAACGCGTAAA                                    |
| R20* -     | AGCTTTTACGCGT <b>TAA</b> GGG <b>CCTACC</b> ACAGATGGTCTGAGAGGTAATCCTGA                           |
| A21* +     | CTAGTCAGGAT <b>TACCTCTCAGACCATCTGTGGAGATAG</b> CTTAACGCGTAAA                                    |
| A21* -     | AGCTTTTACGCGT <b>TAA</b> G <b>CTAT</b> CTCCACAGATGGTCTGAGAGGTAATCCTGA                           |
| L22* +     | CTAGTCAGGAT <b>TACCTCTCAGACCATCTGTGGAGAGCCTAGA</b> ACGCGTAAA                                    |
| L22* -     | AGCTTTTACGCGT <b>TCTAG</b> GCTCTCCACAGATGGTCTGAGAGGTAATCCTGA                                    |

|        |                                                               |
|--------|---------------------------------------------------------------|
| N23* + | CTAGTCAGGATTACCTCTCAGACCATCTGTGGAGAGCCCTTT <b>AG</b> GGCGTAAA |
| N23* - | AGCTTTTACGCCT <b>TAA</b> AGGGCTCTCCACAGATGGTCTGAGAGGTAATCCTGA |
| A24* + | CTAGTCAGGATTACCTCTCAGACCATCTGTGGAGAGCCCTTAACT <b>AG</b> TAAA  |
| A24* - | AGCTTTTACT <b>AG</b> TTAAGGGCTCTCCACAGATGGTCTGAGAGGTAATCCTGA  |
| R20K + | CTAGTCAGGATTACCTCTCAGACCATCTGTGG <b>AA</b> AGCCCTTAACGCGTAAA  |
| R20K - | AGCTTTTACGCGTTAAGGGCT <b>TT</b> CCACAGATGGTCTGAGAGGTAATCCTGA  |

**Supplementary Table 2. PCR primers used to amplify linear DNA fragments as templates to generate mRNAs encoding AAPs.**

| Oligo Name      | Sequence (5' - 3')                 |
|-----------------|------------------------------------|
| T7 upstream +   | AGTAGGTTGAGGCCGTTGA                |
| 21 trunc -      | GGCTCTCCACAGATGGTCT                |
| 22 trunc -      | AAGGGCTCTCCACAGATGG                |
| 23 trunc -      | GTTAAGGGCTCTCCACAGA                |
| 24 trunc -      | CGCGTTAAGGGCTCTCCAC                |
| 25 trunc -      | GACCGCGTTAAGGGCTCTC                |
| W19A 24 trunc - | CGCGTTAAGGGCTCT <b>CGCC</b> AGATGG |
| W19Y 24 trunc - | CGCGTTAAGGGCTCT <b>GTAC</b> AGATGG |
| R20* 25 trunc - | GACCGCGTTAAGGG <b>CCTAC</b>        |
| A21* 25 trunc - | GACCGCGTTAAG <b>CTATCTC</b>        |
| L22* 25 trunc - | GACCGCGTT <b>CTAGG</b> CTCTC       |
| N23* 25 trunc - | GACCG <b>CCTAA</b> AGGGCTCTC       |
| A24* 25 trunc - | GAC <b>CTAG</b> TTAAGGGCTCTC       |
| R20K 25 trunc - | GACCGCGTTAAGGG <b>CTTTC</b>        |

Supplementary Table 3. Quantitative analyses of AAP nascent chain photoadducts to ribosomal proteins. The amount of radiolabeled AAP nascent chain that formed photoadducts with ribosomal proteins rpL4 and rpL17 was determined using ImageQuant TL (GE Healthcare) and presented as the fraction of sum of radiolabeled AAP, both crosslinked and uncrosslinked.

Table S3A, related to Fig. 5a.

|       | WT, +Arg | WT, -Arg | D12N, +Arg | D12N, -Arg |
|-------|----------|----------|------------|------------|
| rpL4  | 7.9      | 3.6      | 3.7        | 3.2        |
| rpL17 | 1.4      | 2.0      | 1.4        | 1.5        |
| AAP   | 90.7     | 94.4     | 94.8       | 95.3       |

Table S3B, related to Fig. 5b.

|       | WT, +Arg | WT, -Arg | D12N, +Arg | D12N, -Arg |
|-------|----------|----------|------------|------------|
| rpL4  | 9.2      | 4.3      | 4.7        | 4.5        |
| rpL17 | 2.4      | 8.0      | 4.6        | 4.7        |
| AAP   | 88.4     | 87.7     | 90.7       | 90.8       |

Table S3C, related to Fig. 5c.

|       | WT, +Arg | WT, -Arg |
|-------|----------|----------|
| rpL4  | 7.3      | 5.7      |
| rpL17 | 0.6      | 1.9      |
| AAP   | 92.1     | 92.4     |

Table S3D, related to Fig. 6a.

|       | A21  |      | L22  |      | N23  |       | A24  |      | V25  |      |
|-------|------|------|------|------|------|-------|------|------|------|------|
|       | +Arg | -Arg | +Arg | -Arg | +Arg | -Arg  | +Arg | -Arg | +Arg | -Arg |
| rpL4  | 11.6 | 13.7 | 17.2 | 11.0 | 12.9 | 14.2  | 11.2 | 5.8  | 9.6  | 6.1  |
| rpL17 | 0.4  | 1.1  | 0.6  | 0.9  | 0.2  | 1.7   | 1.0  | 3.0  | 1.1  | 2.3  |
| AAP   | 88.0 | 85.2 | 82.2 | 88.1 | 86.9 | 84.01 | 87.8 | 91.2 | 89.3 | 91.6 |

Table S3E, related to Fig. 6b.

|       | WT   |      | W19A |      | W19Y |      | D12N |      |
|-------|------|------|------|------|------|------|------|------|
|       | +Arg | -Arg | +Arg | -Arg | +Arg | -Arg | +Arg | -Arg |
| rpL4  | 13.9 | 7.4  | 8.9  | 9.5  | 9.0  | 7.1  | 6.5  | 5.3  |
| rpL17 | 1.2  | 3.4  | 3.4  | 4.1  | 1.9  | 3.1  | 1.9  | 1.6  |
| AAP   | 84.9 | 89.2 | 87.7 | 86.4 | 89.1 | 89.8 | 91.6 | 93.1 |

Table S3F, related to Fig. 6c.

|       | WT   |        |      |      | D12N |        |      |      |
|-------|------|--------|------|------|------|--------|------|------|
|       | +Arg | +D-Arg | +RGD | -    | +Arg | +D-Arg | +RGD | -    |
| rpL4  | 14.0 | 6.7    | 9.3  | 6.1  | 7.0  | 4.7    | 6.1  | 5.2  |
| rpL17 | 1.1  | 3.2    | 1.4  | 3.3  | 2.0  | 1.5    | 1.8  | 1.7  |
| AAP   | 84.9 | 90.1   | 89.3 | 90.6 | 91.0 | 93.8   | 92.1 | 93.1 |

Table S3G, related to Fig. 7.

|       | +Arg, +Cyh | -Arg, +Cyh | -Arg, +Cyh,<br>+Arg | +Arg | -Arg |
|-------|------------|------------|---------------------|------|------|
| rpL4  | 15.9       | 10.6       | 15.9                | 10.9 | 10.0 |
| rpL17 | 1.1        | 3.3        | 1.1                 | 0.6  | 3.3  |
| AAP   | 83.0       | 86.1       | 83.0                | 88.5 | 86.7 |

Supplementary Table 4. Quantitative analyses of AAP nascent chain photoadducts to ribosomal proteins. The amount of radiolabeled AAP nascent chain that formed photoadducts with ribosomal proteins rpL4 and rpL17 was determined using ImageQuant TL (GE Healthcare).

|          | L4                       |                          | L17                      |                          |      |
|----------|--------------------------|--------------------------|--------------------------|--------------------------|------|
|          | +Arg                     | -Arg                     | +Arg                     | -Arg                     |      |
| A21      | 0.963±0.005              | 0.925±0.003              | 0.037±0.005              | 0.075±0.003              | N=3  |
| L22      | 0.974±0.009              | 0.929±0.003              | 0.026±0.009              | 0.071±0.003              | N=3  |
| N23      | 0.983±0.004              | 0.900±0.008              | 0.017±0.004              | 0.100±0.008              | N=3  |
| A24      | 0.927±0.009              | 0.695±0.035              | 0.073±0.009              | 0.305±0.035              | N=7  |
| A24 D12N | 0.779±0.002              | 0.757±0.009              | 0.221±0.002              | 0.243±0.009              | N=2* |
| V25      | 0.890±0.028              | 0.704±0.044              | 0.110±0.027              | 0.296±0.044              | N=6  |
| V25 D12N | 0.729±0.004              | 0.681±0.005              | 0.271±0.004              | 0.319±0.005              | N=2  |
| A24      | 0.671±0.005 <sup>a</sup> |                          | 0.329±0.005 <sup>a</sup> |                          | N=2  |
| A24      | 0.838±0.030 <sup>b</sup> |                          | 0.162±0.030 <sup>b</sup> |                          | N=2  |
| A24      | 0.933±0.001 <sup>c</sup> | 0.752±0.008 <sup>c</sup> | 0.067±0.001 <sup>c</sup> | 0.248±0.008 <sup>c</sup> | N=2  |
| A24      | 0.917±0.017 <sup>d</sup> |                          | 0.083±0.017 <sup>d</sup> |                          | N=2  |
| W19A     | 0.749±0.028              | 0.719±0.021              | 0.251±0.028              | 0.281±0.021              | N=2  |
| W19Y     | 0.836±0.011              | 0.707±0.013              | 0.164±0.011              | 0.293±0.013              | N=2  |

<sup>a</sup>, 2mM D-Arg was added instead of Arg.

<sup>b</sup>, 2mM RGD was added instead of Arg.

<sup>c</sup>, translation was stopped by Cyh before UV irradiation, as described in Fig. 7.

<sup>d</sup>, 2mM Arg added after translation was stopped by Cyh, as described in Fig. 7.

\*, when N=2, average deviation, not standard deviation, is calculated.
